# Supplementary material
Source: MDPI journal article supplement (https://www.mdpi.com/2571-8789/6/2/54)
Supplement: s1 [file s1 › soilsystems-1763791-supplementary.pdf]

# Microplastic extraction from agricultural soils using canola oil and unsaturated sodium chloride solution

## Supplementary material

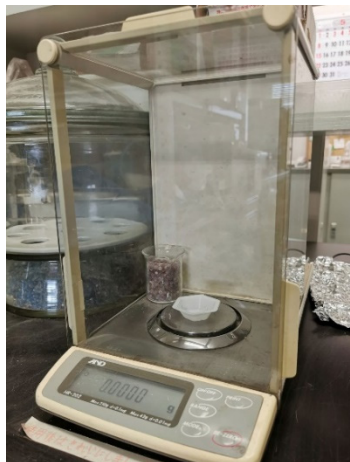

1. Weight all the necessary samples

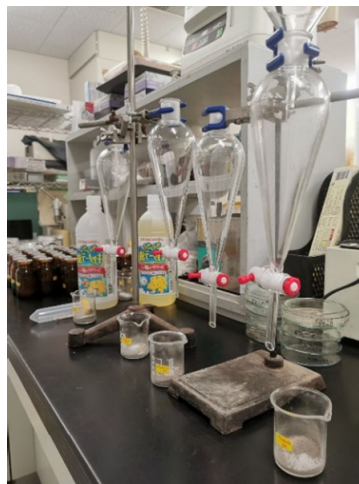

2. Place the soil and plastics into funnels

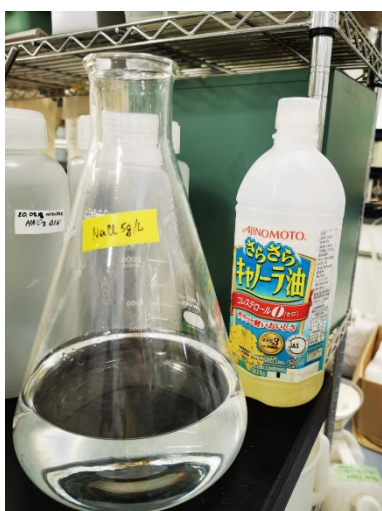

3. Pour NaCl solution and oil

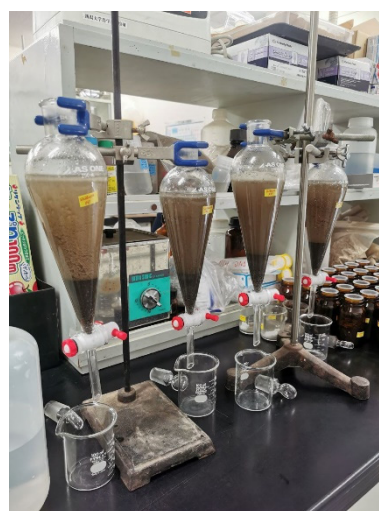

4. Close funnels and shake them evenly. Then, leave them for 30 minutes. Let the solid phase pass through the bottom of funnels

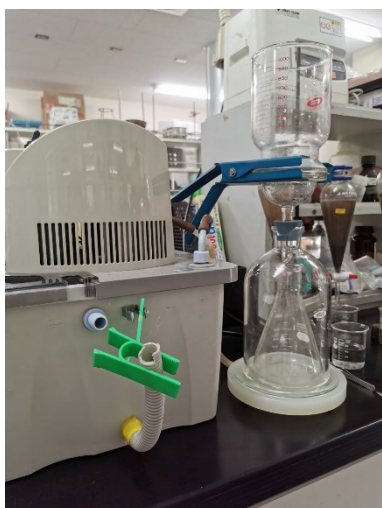

5. Filtrate the liquid phase through a glass fibre membrane, and wash with ethanol. Then, put

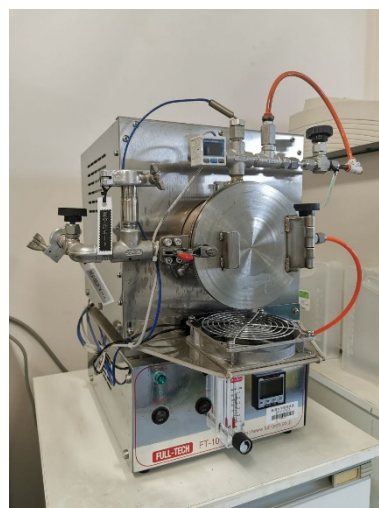

6. Weight the filter and incinerate it in a furnace

the membrane onto a petri dish, add H<sub>2</sub>O<sub>2</sub> and put it into a dryer at 60°

**Figure S1.** Experimental setup.

**Table S1.** Incineration rates of virgin plastics at different temperatures<sup>¶</sup>

| Type of plastics | Incineration rate, %  |                         |              |
|------------------|-----------------------|-------------------------|--------------|
|                  | Pyrolysis temperature |                         |              |
|                  | 500 °C                | 600 °C                  | 700 °C       |
| LDPE             | 99.8 ± 0.1            | 99.4 ± 0.1              | 100. 0 ± 0.0 |
| PP               | 98.3 ± 0.2            | 98.6 ± 0.0              | 98.3 ± 0.2   |
| PVC              | 72.8 ± 0.2            | 74.0 <sup>#</sup> ± 0.4 | 74.3 ± 0.0   |

LDPE: Low density polyethylene, PP: Polypropylene, and PVC: Polyvinyl chloride

<sup>¶</sup> Average ± S.E. (n=3)

<sup>#</sup> This value is used as R<sub>PVC</sub> in calculations of the recovery rate for PVC particles.
